# Supplementary material for: Gold Nanoparticles Supported on Ceria Nanoparticles Modulate Leukocyte–Endothelium Cell Interactions and Inflammation in Type 2 Diabetes
Source: MDPI journal article supplement (doi:10.3390/antiox11112297), 2022-11-20

# Size Distribution Report by Volume

v2.0

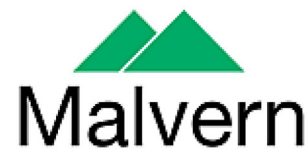

Malvern Instruments Ltd - © Copyright 2008

## Sample Details

**Sample Name:** 1.79% Au/CeO<sub>2</sub>\_0.7 mg 1

**SOP Name:** mansettings.nano

**General Notes:**

**File Name:** 1.79% Au/CeO<sub>2</sub>\_0.7 mg.dts **Dispersant Name:** Water

**Record Number:** 1 **Dispersant RI:** 1,330

**Material RI:** 1,36 **Viscosity (cP):** 0,8872

**Material Absorbtion:** 0,01 **Measurement Date and Time:** jueves, 27 de octubre de ...

## System

**Temperature (°C):** 25,0

**Duration Used (s):** 70

**Count Rate (kcps):** 170,3

**Measurement Position (mm):** 4,65

**Cell Description:** Disposable sizing cuvette

**Attenuator:** 8

## Results

|                                |                | Diam. (nm) | % Volume | Width (nm) |
|--------------------------------|----------------|------------|----------|------------|
| <b>Z-Average (d.nm):</b> 487,9 | <b>Peak 1:</b> | 410,7      | 0,1      | 203,3      |
| <b>Pdl:</b> 0,578              | <b>Peak 2:</b> | 4678       | 1,9      | 1015       |
| <b>Intercept:</b> 0,179        | <b>Peak 3:</b> | 4,562      | 98,0     | 1,385      |

**Result quality** **Refer to quality report**

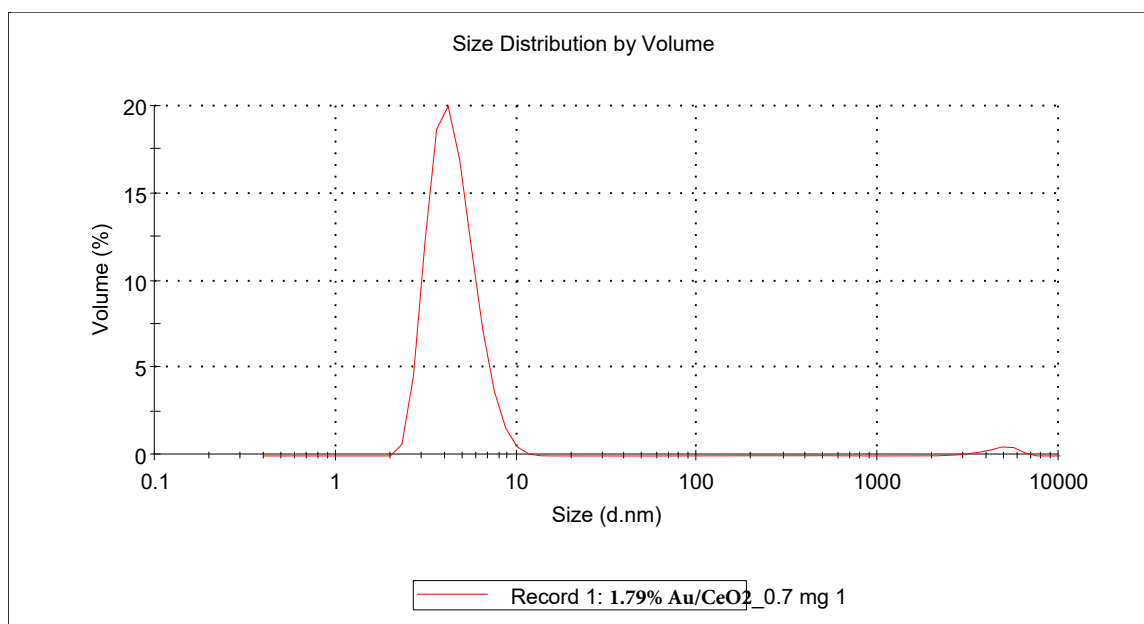

# Zeta Potential Report

v2.2

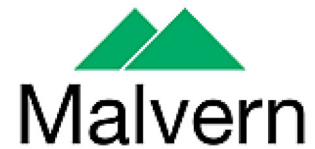

Malvern Instruments Ltd - © Copyright 2008

## Sample Details

**Sample Name:** 1.79% AuCeO<sub>2</sub>-H<sub>2</sub>O\_AVG  
**SOP Name:** 1.79% AuCeO<sub>2</sub>-H<sub>2</sub>O.sop  
**General Notes:** Average result created from record number(s): 5 12 13

**File Name:** 1.79% Au/CeO<sub>2</sub>\_0.7 mg.dts  
**Record Number:** 16  
**Date and Time:** jueves, 27 de octubre de 2022...  
**Dispersant Name:** Water  
**Dispersant RI:** 1,330  
**Viscosity (cP):** 0,8872  
**Dispersant Dielectric Constant:** 78,5

## System

**Temperature (°C):** 25,0  
**Count Rate (kcps):** 87,6  
**Cell Description:** Clear disposable zeta cell  
**Zeta Runs:** 15  
**Measurement Position (mm):** 2,00  
**Attenuator:** 11

## Results

|                                      | Mean (mV)            | Area (%) | Width (mV) |
|--------------------------------------|----------------------|----------|------------|
| <b>Zeta Potential (mV):</b> -17,1    | <b>Peak 1:</b> -15,7 | 100,0    | 6,50       |
| <b>Zeta Deviation (mV):</b> 5,70     | <b>Peak 2:</b> 0,00  | 0,0      | 0,00       |
| <b>Conductivity (mS/cm):</b> 0,00350 | <b>Peak 3:</b> 0,00  | 0,0      | 0,00       |

**Result quality** Good

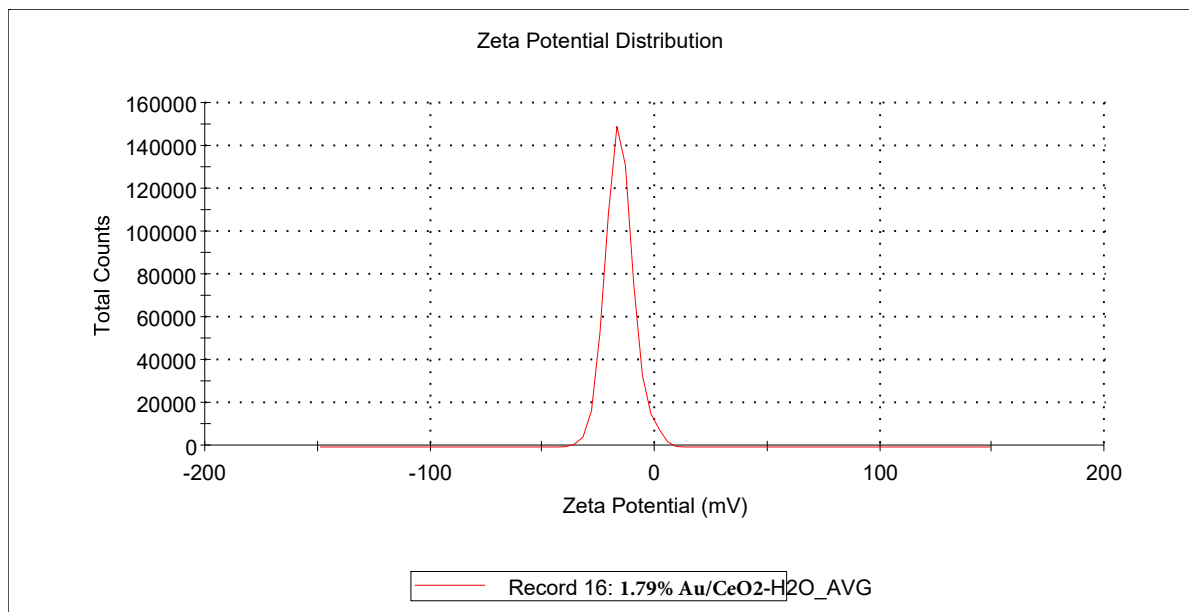

# Zeta Potential Report

v2.2



Malvern Instruments Ltd - © Copyright 2008

## Sample Details

**Sample Name:** 0.82% Au/CeO<sub>2</sub>\_0.7 mg\_AVG

**SOP Name:** 0.82% Au/CeO<sub>2</sub>-H<sub>2</sub>O.sop

**General Notes:** Average result created from record number(s): 9 11 13

|                                                         |                               |
|---------------------------------------------------------|-------------------------------|
| <b>File Name:</b> 0.82% Au/CeO <sub>2</sub> _0.7 mg.dts | <b>Dispersant Name:</b> Water |
| <b>Record Number:</b> 21                                | <b>Dispersant RI:</b> 1,330   |
| <b>Date and Time:</b> jueves, 27 de octubre de 2022...  | <b>Viscosity (cP):</b> 0,8872 |
| <b>Dispersant Dielectric Constant:</b> 78,5             |                               |

## System

|                                                     |                                        |
|-----------------------------------------------------|----------------------------------------|
| <b>Temperature (°C):</b> 25,0                       | <b>Zeta Runs:</b> 14                   |
| <b>Count Rate (kcps):</b> 15,0                      | <b>Measurement Position (mm):</b> 2,00 |
| <b>Cell Description:</b> Clear disposable zeta cell | <b>Attenuator:</b> 11                  |

## Results

|                                      | Mean (mV)            | Area (%) | Width (mV) |
|--------------------------------------|----------------------|----------|------------|
| <b>Zeta Potential (mV):</b> -31,9    | <b>Peak 1:</b> -31,1 | 100,0    | 5,66       |
| <b>Zeta Deviation (mV):</b> 5,99     | <b>Peak 2:</b> 0,00  | 0,0      | 0,00       |
| <b>Conductivity (mS/cm):</b> 0,00213 | <b>Peak 3:</b> 0,00  | 0,0      | 0,00       |

**Result quality** Good

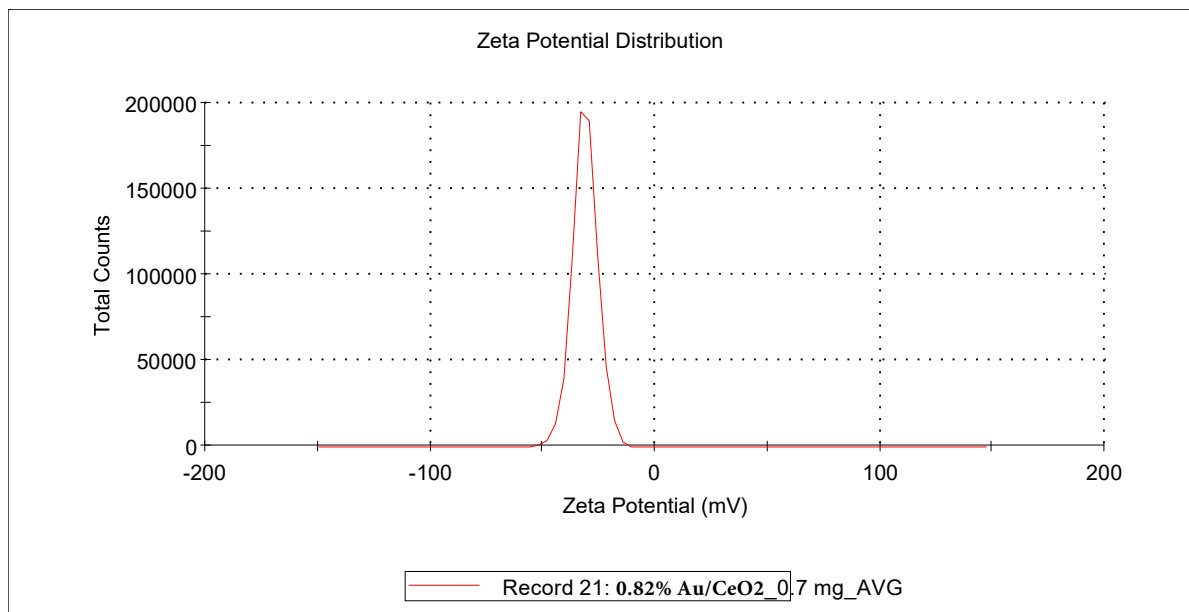

# Size Distribution Report by Volume

v2.0

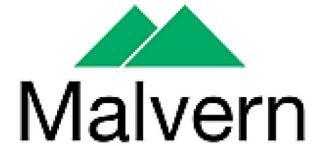

Malvern Instruments Ltd - © Copyright 2008

## Sample Details

**Sample Name:** 0.82% Au/CeO<sub>2</sub>\_0.7 mg 3

**SOP Name:** 0.82% Au/CeO<sub>2</sub>-H<sub>2</sub>O.sop

**General Notes:**

|                                                         |                                                                |
|---------------------------------------------------------|----------------------------------------------------------------|
| <b>File Name:</b> 0.82% Au/CeO <sub>2</sub> _0.7 mg.dts | <b>Dispersant Name:</b> Water                                  |
| <b>Record Number:</b> 3                                 | <b>Dispersant RI:</b> 1,330                                    |
| <b>Material RI:</b> 1,83                                | <b>Viscosity (cP):</b> 0,8872                                  |
| <b>Material Absorbtion:</b> 0,01                        | <b>Measurement Date and Time:</b> jueves, 27 de octubre de ... |

## System

|                                                    |                                        |
|----------------------------------------------------|----------------------------------------|
| <b>Temperature (°C):</b> 25,0                      | <b>Duration Used (s):</b> 70           |
| <b>Count Rate (kcps):</b> 33,7                     | <b>Measurement Position (mm):</b> 4,65 |
| <b>Cell Description:</b> Disposable sizing cuvette | <b>Attenuator:</b> 10                  |

## Results

|                                |                | <b>Diam. (nm)</b> | <b>% Volume</b> | <b>Width (nm)</b> |
|--------------------------------|----------------|-------------------|-----------------|-------------------|
| <b>Z-Average (d.nm):</b> 239,5 | <b>Peak 1:</b> | 308,3             | 0,2             | 168,3             |
| <b>Pdl:</b> 0,420              | <b>Peak 2:</b> | 5109              | 0,2             | 818,0             |
| <b>Intercept:</b> 0,428        | <b>Peak 3:</b> | 6,185             | 99,6            | 1,395             |

**Result quality** **Refer to quality report**

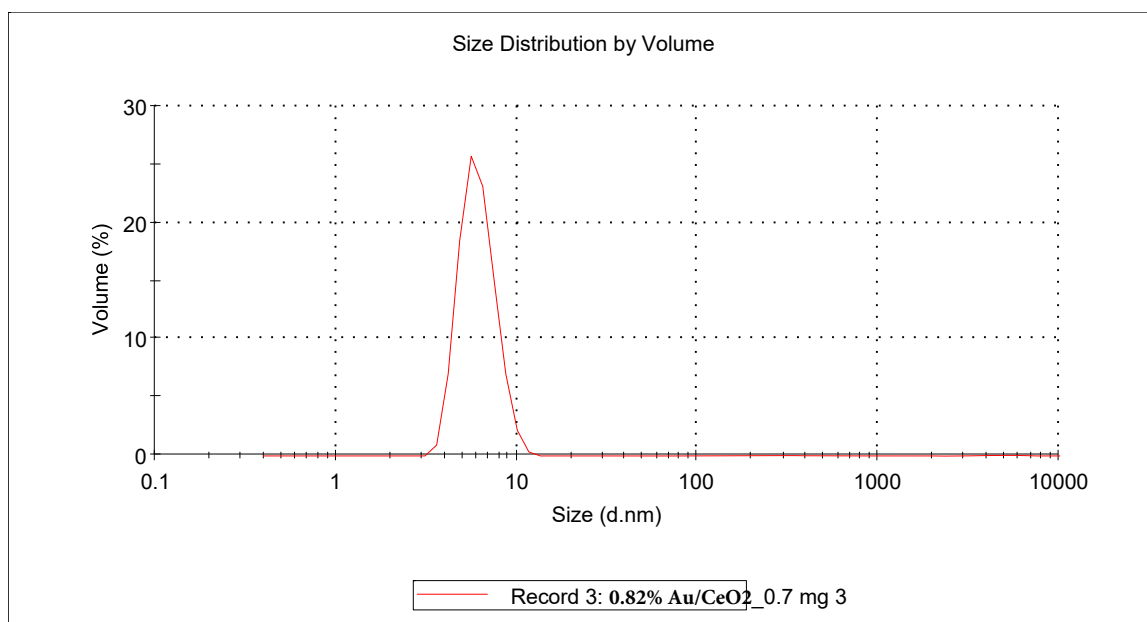

## Supplementary Figure S1

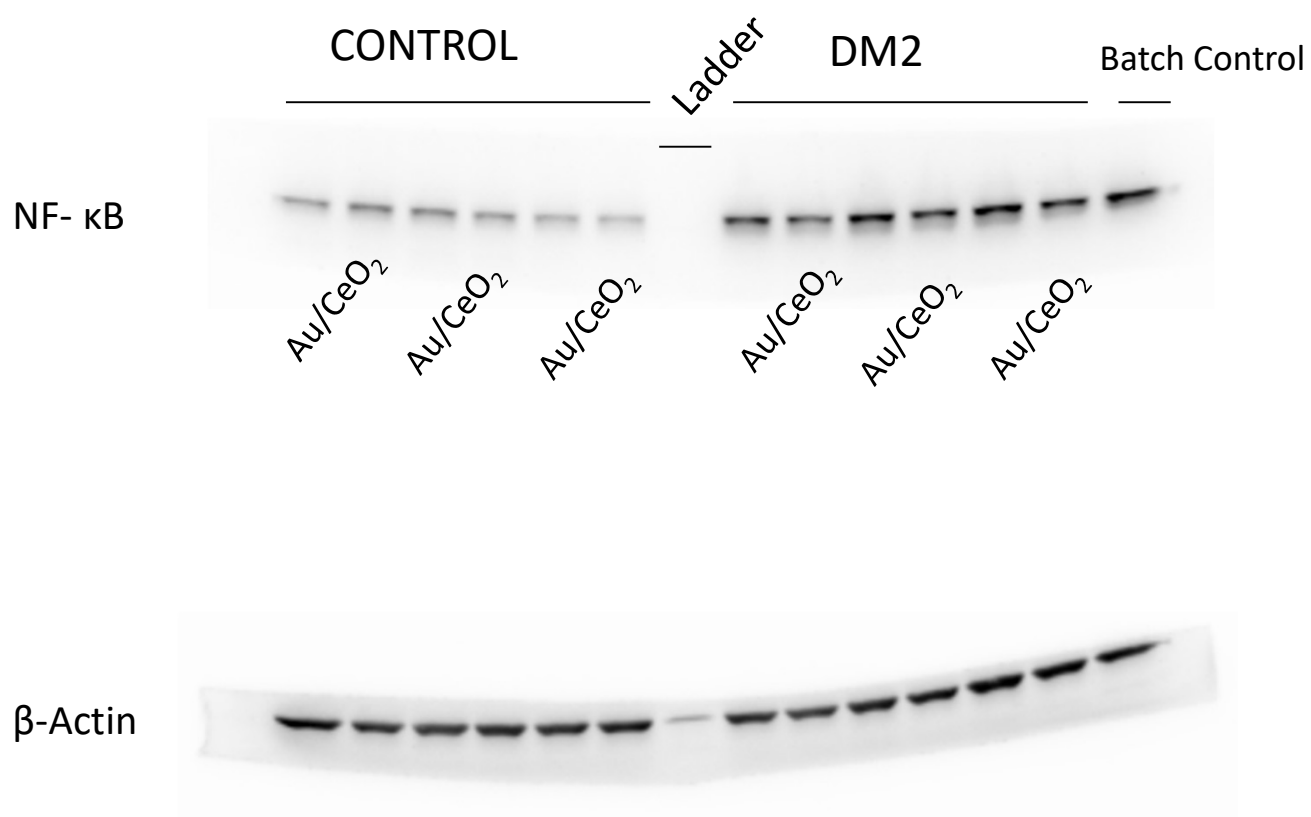

Supplement: s1 [file s1]
